# Supplementary material
Source: publisher site journal article supplement (https://www.dovepress.com/article/342391)
Supplement: Supplementary file 1 [file get_supplementary_file.php]

# Supplementary materials

**Supplementary Table 1:** Tezepelumab clinical trials.

| **Study name** | **Phase** | **Study design** | **Population** | **Treatment** | **Primary endpoint** |
| --- | --- | --- | --- | --- | --- |
| PATHWAY1 (NCT02054130) | 2 | Randomized, double-blind, placebo-controlled trial | N=550 patients whose asthma remained uncontrolled despite treatment with long-acting beta-agonists and medium- or high-dose inhaled corticosteroids | Patients were randomized to one of three doses of tezepelumab (70 mg Q4W, 210 mg Q4W, 280 mg Q2W) or placebo | Annualized rate of asthma exacerbations over 52 weeks |
| NAVIGATOR2,3 (NCT03347279) | 3 | Randomized, double-blind, placebo-controlled trial | N=1061 patients with severe uncontrolled asthma who were receiving treatment with medium- or high-dose inhaled corticosteroids plus at least one additional controller medication with or without oral corticosteroids | Patients were randomized to tezepelumab 210 mg Q4W or placebo for 52 weeks | Annualized rate of asthma exacerbations over 52 weeks |
| SOURCE4,5 (NCT03406078) | 3 | Randomized, double-blind, placebo-controlled trial | N=150 patients with oral corticosteroid-dependent asthma | Patients were randomized to tezepelumab 210 mg Q4W or placebo for 48 weeks | Percentage reduction from baseline in daily oral corticosteroid dose at Week 48 without the loss of asthma control |
| UPSTREAM6 (NCT02698501) | 2 | Randomized, double-bind, placebo-controlled trial | N=40 patients with asthma and AHR to mannitol | Patients were randomized to tezepelumab 700 mg IV or placebo | Change in AHR from baseline to Week 12 |
| CASCADE7,8 (NCT03688074) | 2 | Randomized, double-blind, placebo-controlled trial | N=116 patients with uncontrolled, moderate-to-severe asthma | Patients were randomized to tezepelumab 210 mg Q4W or placebo for 28 weeks (extended to 52 weeks if COVID-19-related disruption delayed participants’ end-of-treatment assessments) | Change from baseline to Week 28 in airway submucosal inflammatory cells (eosinophils, neutrophils, T cells, and mast cells) from bronchoscopic biopsies |
| PATH-HOME9 (NCT03968978) | 3 | Randomized, open-label, parallel-group trial | N=216 patients with asthma that was uncontrolled despite treatment with medium- to high-dose inhaled corticosteroids plus at least one additional controller medication | Patients were randomized to an accessorized prefilled syringe or an autoinjector | Proportion of successful administrations of tezepelumab |
| DESTINATION extension study10 (NCT03706079) | 3 | Randomized, double-bind, placebo-controlled extension study of NAVIGATOR and SOURCE | N=1209 patients from the NAVIGATOR and SOURCE studies | Those previously randomized to tezepelumab in either parent study continued tezepelumab (210 mg Q4W). Those previously randomized to placebo in either parent study were re‑randomized 1:1 to receive either tezepelumab (210 mg Q4W) or placebo | Exposure-adjusted incidence of adverse events and serious adverse events assessed from Week 0 of the parent studies to Week 104 of DESTINATION |

**Abbreviations:** AHR, airway hyperresponsiveness; COVID-19, coronavirus disease 2019; IV, intravenous; Q4W, every 4 weeks.

**References**

1. Corren J, Parnes JR, Wang L, et al. Tezepelumab in Adults with Uncontrolled Asthma. *N Engl J Med* 2017;377:936–946.

2. Menzies-Gow A, Colice G, Griffiths JM, et al. NAVIGATOR: a phase 3 multicentre, randomized, double-blind, placebo-controlled, parallel-group trial to evaluate the efficacy and safety of tezepelumab in adults and adolescents with severe, uncontrolled asthma. *Respiratory Research* 2020;21:266.

3. Menzies-Gow A, Corren J, Bourdin A, et al. Tezepelumab in Adults and Adolescents with Severe, Uncontrolled Asthma. *N Engl J Med* 2021;384:1800–1809.

4. Wechsler ME, Colice G, Griffiths JM, et al. SOURCE: a phase 3, multicentre, randomized, double-blind, placebo-controlled, parallel group trial to evaluate the efficacy and safety of tezepelumab in reducing oral corticosteroid use in adults with oral corticosteroid dependent asthma. *Respiratory Research* 2020;21:264.

5. Wechsler ME, Menzies-Gow A, Brightling CE, et al. Evaluation of the oral corticosteroid-sparing effect of tezepelumab in adults with oral corticosteroid-dependent asthma (SOURCE): a randomised, placebo-controlled, phase 3 study. *Lancet Respir Med* 2022;10:650–660.

6. Sverrild A, Hansen S, Hvidtfeldt M, et al. The effect of tezepelumab on airway hyperresponsiveness to mannitol in asthma (UPSTREAM). *Eur Respir J* 2021;59:2101296.

7. Diver S, Khalfaoui L, Emson C, et al. Effect of tezepelumab on airway inflammatory cells, remodelling, and hyperresponsiveness in patients with moderate-to-severe uncontrolled asthma (CASCADE): a double-blind, randomised, placebo-controlled, phase 2 trial. *Lancet Respir Med* 2021;9:1299–1312.

8. Emson C, Diver S, Chachi L, et al. CASCADE: a phase 2, randomized, double-blind, placebo-controlled, parallel-group trial to evaluate the effect of tezepelumab on airway inflammation in patients with uncontrolled asthma. *Respiratory Research* 2020;21:265.

9. Alpizar S, Megally A, Chen C, et al. Functionality and Performance of an Accessorized Pre-Filled Syringe and an Autoinjector for At-Home Administration of Tezepelumab in Patients with Severe, Uncontrolled Asthma. *J Asthma Allergy* 2021;14:381–392.

10. Menzies-Gow A, Wechsler ME, Brightling CE, et al. Long-term safety and efficacy of tezepelumab in people with severe, uncontrolled asthma (DESTINATION): a randomised, placebo-controlled extension study. *Lancet Respir Med* 2023;11:425–483.
